# Supplementary material for: Optimised Heterologous Expression and Functional Analysis of the Yersinia pestis F1-Capsular Antigen Regulator Caf1R
Source: Int J Mol Sci. 2021 Sep 10;22(18):9805. doi: 10.3390/ijms22189805 (PMC8470410; doi:10.3390/ijms22189805)
Supplement: Supplementary file 1 [file ijms-22-09805-s001.zip › ijms-1345460 Supplementary.pdf]

# SUPPLEMENTARY INFORMATION

## Optimised Heterologous Expression and Functional Analysis of the *Yersinia pestis* F1-Capsular Antigen Regulator Caf1R

Dharmender K. Gahlot<sup>1,2,3\*</sup>, Gyles Ifill<sup>1,4</sup> and Sheila MacIntyre<sup>1\*</sup>

<sup>1</sup>School of Biological Sciences, University of Reading, RG6 6UR Reading, United Kingdom

<sup>2</sup>Department of Molecular Biology, Umeå University, 901 87 Umeå, Sweden

<sup>3</sup>Umeå Centre for Microbial Research (UCMR), Umeå University, 901 87 Umeå, Sweden

<sup>4</sup>Department of Microbiology and Immunology, University of British Columbia, V6T 1Z3, Vancouver, British Columbia, Canada

\*Correspondence: dharmender.kumar@umu.se (D.K.G); s.macintyre@reading.ac.uk (S.M.)

### Tables

Table S1. DNA oligos/primers used in this study.

Table S2. Plasmids used in this study.

Table S3. *E. coli* strains used in this study.

### Figures

Figure S1. The pBADhCaf1R plasmid construct.

Figure S2. The pEThCaf1R plasmid construct.

Figure S3. Expression of His-Caf1R (native *caf1R*) from *E. coli* BL21(DE3).

Figure S4. Sequence alignment of native Caf1R with codon-optimised Caf1R\*.

Figure S5. The pEThCaf1R\* plasmid construct.

Figure S6. The pMALCaf1R plasmid construct.

Figure S7. The pMALCaf1R\* plasmid construct.

Figure S8. Expression of MBP-Caf1R (native *caf1R*) from *E. coli* BL21(DE3) and K12 ER2508.

Figure S9. The pMALCaf1R<sub>N</sub> plasmid construct.

Figure S10. The pACYC-R and pACYC-MA1 plasmid constructs.

Table S1. DNA oligos/primers used in this study.

| Plasmid                             | Primer                       | Sequence (5'-3')                                                                    | GC (%) | Tm (°C) |
|-------------------------------------|------------------------------|-------------------------------------------------------------------------------------|--------|---------|
| <b>InFusion primers<sup>1</sup></b> |                              |                                                                                     |        |         |
| pET <sub>h</sub> Caf1R              | pETCaf1Rf                    | <b>CAGCCATATGGCTAGCAAG</b> GCTAGCTGGGG<br>ATCC <b>GAGCTCATTG</b> <u><i>NheI</i></u> | 57.7   | 68.0    |
|                                     | pETCaf1Rr                    | <b>GACGGAGCTCGAATTC</b> TTGAAATCCATA<br>TGGTACCAGC <u><i>EcoRI</i></u>              | 50.0   | 60.3    |
| pMALCaf1R                           | pMALCaf1Rf                   | <b>AAGGATTTGAGAATTC</b> GTTGAATTCATGCT<br>AAACAGATG <u><i>EcoRI</i></u>             | 33.3   | 55.9    |
|                                     | pMALCaf1Rr                   | <b>CGACTCTAGAGGATCC</b> TATGGATCCAGCTG<br>CAGATC <u><i>BamHI</i></u>                | 50.0   | 57.3    |
| pMALCaf1R*                          | pMALCaf1R_GSf                | <b>AAGGATTTGAGAATTC</b> ATGCTGAAACAAAT<br>GACCGTGAAC <u><i>EcoRI</i></u>            | 41.7   | 59.3    |
|                                     | pMALCaf1R_GSr                | <b>CGACTCTAGAGGATCC</b> TTATGATTTTC<br>GGCAGACCCAGCGT <u><i>BamHI</i></u>           | 50.0   | 62.7    |
| pMALCaf1R <sub>N</sub>              | pMALCaf1RNifF                | <b>AAGGATTTGAGAATTC</b> TCCGAGCTCATTG<br>GGTTATATTC                                 | 41.7   | 59.3    |
|                                     | pMALCaf1RNinfR               | <b>CGACTCTAGAGGATCC</b> TTAAAGGACCAAA<br>AAGGGATCATC <u>TTA-Stop codon</u>          | 36.0   | 58.1    |
| pDKGcaf1M <sup>'-197+158-lacZ</sup> | pRS550(13-16)F;<br>Delta1for | <b>CAGGAATTGGGGATC</b> TGCGCAACAAGCAAG<br>TGGAGTG                                   | 50.0   | 62.7    |
|                                     | pRS550(13-16)R               | <b>GTCCGGATCGGAATT</b> CCTAACGGGTATATGA<br>TCCTACTCTC                               | 44.0   | 61.3    |
| pDKGcaf1M <sup>'-184+158-lacZ</sup> | Delta 15F                    | <b>CAGGAATTGGGGATC</b> AGTGGAGTGCGC                                                 | 66.7   | 40.0    |
|                                     | Delta 550R                   | <b>GTCCGGATCGGAATT</b> CCTAACGGGTATATGAT<br>CC                                      | 44.4   | 51.4    |
| pDKGcaf1M <sup>'-169+158-lacZ</sup> | Delta 14F                    | <b>CAGGAATTGGGGATC</b> AAGCTAACTTTGTG<br>TG                                         | 35.3   | 45.5    |
|                                     | Delta 550R                   | <b>GTCCGGATCGGAATT</b> CCTAACGGGTATATGAT<br>CC                                      | 44.4   | 51.4    |
| pDKGcaf1M <sup>'-141+158-lacZ</sup> | Delta4for                    | <b>CAGGAATTGGGGATC</b> AAAATTGTTCTCAGT<br>GAGGCTG                                   | 40.9   | 56.5    |
|                                     | pRS550(13-16)R               | <b>GTCCGGATCGGAATT</b> CCTAACGGGTATATGA<br>TCCTACTCT                                | 44.0   | 61.3    |
| pDKGcaf1M <sup>'-102+158-lacZ</sup> | pRS550(13-17)F<br>or Delta2  | <b>CAGGAATTGGGGATC</b> TCCCCTTCATTTGTT<br>ACCCACC                                   | 44.4   | 51.4    |
|                                     | pRS550(13-16)R               | <b>GTCCGGATCGGAATT</b> CCTAACGGGTATATGA<br>TCCTACTCTC                               | 44.0   | 61.3    |
| pACYC-R                             | pACYCcaf1Rf                  | GCCTAACCCCTC <b>GAGCTCG</b> <u><i>SacI</i></u>                                      | 66.7   | 60.5    |
|                                     | pACYCcaf1Rr                  | GCTT <b>GAGCTC</b> CTTACGGAATG <u><i>SacI</i></u>                                   | 52.4   | 59.8    |

|                                                                      |                      |                                                                   |      |      |
|----------------------------------------------------------------------|----------------------|-------------------------------------------------------------------|------|------|
| <b>pACYC-MA1</b>                                                     | Inv <i>caf1</i> Rfor | AC <b>CCATGG</b> CAAAATAATAGCATTCTAGATA<br>GTG <u><b>NcoI</b></u> | 36.4 | 64.5 |
|                                                                      | Inv <i>caf1</i> Rrev | T <b>CCATGG</b> CAGGAGTCGCATAAGG <u><b>NcoI</b></u>               | 58.3 | 66.1 |
| <b>Sequencing primers to confirm</b>                                 |                      |                                                                   |      |      |
| <b>Recombinant <i>caf1R/R*</i><br/>in pET28a<sup>+</sup> plasmid</b> | T7F                  | TAATACGACTCACTATAGGG                                              | 40.0 | 48.0 |
|                                                                      | T7R                  | GCTAGTTATTGCTCAGCGG                                               | 53.0 | 51.0 |
| <b>Recombinant <i>caf1R/R*</i><br/>in pMALc2x plasmid</b>            | <i>malE</i> for      | GGTCGTCGACTGTCGATGAAGCC                                           | 58.0 | 61.0 |
|                                                                      | M13F                 | TGTAAAACGACGGCCAGT                                                | 50.0 | 48.0 |
| <b><i>caf1R</i> and <i>caf1R-caf1M</i><br/>intergenic region</b>     | ACYCDuetUp1          | GGATCTCGACGCTCTCCCT                                               | 63.0 | 55.0 |
|                                                                      | DuetDown1            | GATTATGCGGCCGTGTACAA                                              | 50.0 | 52.0 |
| <b><i>caf1A-caf1</i> intergenic<br/>region</b>                       | F1for 11             | GTGGATCCCTGGCATTGTGCGAGATAATAG<br>CG                              | 53.0 | 62.7 |
|                                                                      | F1rev 12             | CGGAATTCGCAGTGGTGCTTGCAGTTAAAT<br>C                               | 54.0 | 60.6 |
| <b><i>lacZ</i>-fusion</b>                                            | F1_6                 | CCTTCTGCTGAATCCTGAATAC                                            | 45.0 | 53.0 |
|                                                                      | M13F                 | TGTAAAACGACGGCCAGT                                                | 50.0 | 48.0 |

---

<sup>1</sup>DNA bases from vector ends are indicated in bold capital text and T<sub>m</sub> is shown only from gene specific part, as per InFusion cloning (Clontech-Takara).

Table S2. Plasmids used in this study.

| Plasmid                 | Description                                                                                                                                                                                                                                                                                                                                                                  | Source                                    |
|-------------------------|------------------------------------------------------------------------------------------------------------------------------------------------------------------------------------------------------------------------------------------------------------------------------------------------------------------------------------------------------------------------------|-------------------------------------------|
| pBADHisA                | Low copy number, pBR322-derived expression plasmid (4.1 kb) contains N-terminal His <sub>6</sub> -tag and L-arabinose inducible P <sub>BAD</sub> promoter. Amp <sup>R</sup>                                                                                                                                                                                                  | Invitrogen, UK                            |
| pBADhCaf1R              | pBADHisA based plasmid contains native <i>cpxR</i> in between <i>SacI</i> and <i>BglII</i> restriction sites.                                                                                                                                                                                                                                                                | Alma Lopez-Tolman; SM lab stock           |
| pET28a <sup>+</sup>     | High copy number (~40), pBR322-derived expression plasmid (5.369 kb), contains N-terminal His <sub>6</sub> -tag and T7 promoter, induction by IPTG. Kan <sup>R</sup>                                                                                                                                                                                                         | Novagen, UK                               |
| pEThCaf1R               | pET28a <sup>+</sup> based plasmid, contains N-terminally His <sub>6</sub> -tagged native <i>caf1R</i> .                                                                                                                                                                                                                                                                      | This study                                |
| pMAL-c2x                | Medium copy number (~20), pMB1-derived expression plasmid vector (6.646 kb), contains N-terminal maltose-binding protein (MBP)-tag and <i>Ptac</i> promoter. Specific for over-expression of cytoplasmic protein, induction by IPTG. Amp <sup>R</sup>                                                                                                                        | NEB, UK                                   |
| pMALCaf1R               | pMAL-c2x based plasmid, contains N-terminally MBP-tagged native <i>caf1R</i> .                                                                                                                                                                                                                                                                                               | This study                                |
| pEThCaf1R*              | pET28a <sup>+</sup> based plasmid, contains N-terminally His <sub>6</sub> -tagged synthetic codon-optimised <i>caf1R</i> , cloned in between <i>EcoRI</i> and <i>NheI</i> sites.                                                                                                                                                                                             | GenScript, USA                            |
| pMALCaf1R*              | pMAL-c2x based plasmid, contains N-terminally MBP-tagged synthetic codon-optimised full-length <i>caf1R</i> .                                                                                                                                                                                                                                                                | This study                                |
| pACYC-F1                | Contains <i>Yersinia pestis</i> EV76 <i>caf</i> locus (5.128 kb) with 188 and 175 bp flanking ends (relative to <i>caf1R</i> and <i>caf1</i> stop codon), cloned in between <i>NcoI</i> and <i>SacI</i> restriction sites of medium copy number vector, pACYCDuet-I (Novagen); Cm <sup>R</sup> .<br><i>Note:</i> <i>caf</i> locus is under its own native regulatory system. | 3, SM lab stock                           |
| pACYC-R                 | pACYC-F1 based plasmid contains <i>caf1R</i> under the control of <i>caf1R-caf1M</i> intergenic region; Cm <sup>R</sup> .                                                                                                                                                                                                                                                    | This study                                |
| pACYC-MA1               | pACYC-F1 based plasmid contain <i>cafMA1</i> operon under the control of <i>caf1R-caf1M</i> intergenic region; Cm <sup>R</sup> .                                                                                                                                                                                                                                             | This study                                |
| pRScaf1R' -M' -lacZ     | Contains <i>caf1R-caf1M</i> intergenic region (327 bp) plus first 192 and 158 bp (from the ATG start codon) of <i>caf1R</i> and <i>caf1M</i> . Whole fragment was cloned in between <i>BamHI</i> and <i>EcoRI</i> sites of <i>lac-Z</i> transcriptional reporter, pRS550 plasmid (1); Amp <sup>R</sup> .                                                                     | Qahtani, A. and Pereira, I.; SM lab stock |
| pDKGcaf1M':197+158-lacZ | Derivative of pRScaf1R' -M' -lacZ, containing 197 bp upstream of the <i>caf1M</i> start codon. This fragment harbors R3' and R4' repeats and all predicted promoters for <i>cafMA1</i> .                                                                                                                                                                                     | This study                                |

|                                           |                                                                                                                                                                                                                                   |            |
|-------------------------------------------|-----------------------------------------------------------------------------------------------------------------------------------------------------------------------------------------------------------------------------------|------------|
| <b>pDKGcaf1M<sup>'-184+158-lacZ</sup></b> | Derivative of pRScaf1R <sup>'-M'-lacZ</sup> containing, 184 bp upstream of the <i>caf1M</i> start codon. This fragment possesses R4' repeat and all predicted promoters for <i>cafMA1</i> .                                       | This study |
| <b>pDKGcaf1M<sup>'-169+158-lacZ</sup></b> | Derivative of pRScaf1R <sup>'-M'-lacZ</sup> containing, 169 bp upstream of the <i>caf1M</i> start codon. This fragment possesses part of R4' repeat and all predicted promoters for <i>cafMA1</i> .                               | This study |
| <b>pDKGcaf1M<sup>'-141+158-lacZ</sup></b> | Derivative of pRScaf1R <sup>'-M'-lacZ</sup> containing, 141 bp upstream of the <i>caf1M</i> start codon. This fragment possesses downstream fragment of -10 motif of P <sub>M</sub> <sup>DKG-2</sup> promoter for <i>cafMA1</i> . | This study |
| <b>pDKGcaf1M<sup>'-102+158-lacZ</sup></b> | Derivative of pRScaf1R <sup>'-M'-lacZ</sup> containing, 102 bp upstream of the <i>caf1M</i> start codon. This fragment possesses previously predicted P <sub>M</sub> <sup>K1-2</sup> promoters for <i>cafMA1</i> .                | This study |

---

Antibiotic resistance marker: Amp<sup>R</sup>- Ampicillin, Cm<sup>R</sup>- Chloramphenicol, Kan<sup>R</sup>- Kanamycin

**Table S3. *E. coli* strains used in this study.**

| Strain                  | Purpose and feature                                                                                                                                         | Genotype                                                                                                                                                                                                                                                                                                                                                                                                                                                | Source                                      |
|-------------------------|-------------------------------------------------------------------------------------------------------------------------------------------------------------|---------------------------------------------------------------------------------------------------------------------------------------------------------------------------------------------------------------------------------------------------------------------------------------------------------------------------------------------------------------------------------------------------------------------------------------------------------|---------------------------------------------|
| TOP10                   | Expression studies for pBAD based plasmids. Keeps constant level of L-arabinose during growth.                                                              | F <sup>-</sup> <i>mcrA</i> $\Delta$ ( <i>mrr-hsdRMS-mcrBC</i> ) $\phi$ 80 <i>lacZ</i> $\Delta$ M15 $\Delta$ <i>lacX74</i> <i>recA1</i> <i>araD139</i> $\Delta$ ( <i>ara-leu</i> )7697 <i>galU</i> <i>galK</i> <i>rpsL</i> (Str <sup>R</sup> ) <i>endA1</i> <i>nupG</i> $\lambda$ -                                                                                                                                                                      | Invitrogen, UK<br>Cat. C4040-10             |
| Stellar <sup>TM</sup>   | Transformation of InFusion mixture. Enhanced ability to repair nicks in the InFused DNA fragment.                                                           | F <sup>-</sup> <i>endA1</i> <i>supE44</i> <i>thi-1</i> <i>recA1</i> <i>relA1</i> <i>gyrA96</i> <i>phoA</i> $\Phi$ 80d_ <i>lacZ</i> $\Delta$ M15 $\Delta$ ( <i>lacZYA</i> - <i>argF</i> )U169 $\Delta$ ( <i>mrr-hsdRMS-mcrBC</i> ) $\Delta$ <i>mcrA</i> $\lambda$ -                                                                                                                                                                                      | Clontech, UK<br>Cat. 636763                 |
| BL21(DE3)               | General expression strain of $\lambda$ DE3 lysogen contains a chromosomal copy of T7 RNAP gene under the control of <i>lacUV5</i> promoter.                 | F <sup>-</sup> <i>ompT</i> <i>gal</i> <i>dcm</i> <i>lon</i> <i>hsdSB</i> ( <i>rB</i> <sup>-</sup> <i>mB</i> <sup>-</sup> ) $\lambda$ (DE3)                                                                                                                                                                                                                                                                                                              | ThermoFisher Scientific, UK<br>Cat. C600003 |
| STAR pLysS              | BL21(DE3) derivative, provides enhanced mRNA stability with low protein background.                                                                         | F <sup>-</sup> <i>ompT</i> <i>hsdSB</i> ( <i>rB</i> <sup>-</sup> <i>mB</i> <sup>-</sup> ) <i>gal</i> <i>dcm</i> <i>rne131</i> (DE3) pLysS (Cm <sup>R</sup> )                                                                                                                                                                                                                                                                                            | LifeTechnologies, UK<br>Cat. C6020-03       |
| K12 ER2508              | K12 derivative with <i>lon</i> <sup>-</sup> mutation. Deficient in major ATP-dependent proteases. Improves stability of heterologous proteins in cytoplasm. | F <sup>-</sup> <i>ara-14</i> <i>leuB6</i> <i>fhuA2</i> $\Delta$ ( <i>argF-lac</i> ) U169 <i>lacY1</i> <i>lon::miniTn10</i> (Tet <sup>R</sup> ) <i>glnV44</i> <i>galK2</i> <i>rpsL20</i> (Str <sup>R</sup> ) <i>xyl-5</i> <i>mtl-5</i> $\Delta$ ( <i>malB</i> ) <i>zjc::Tn5</i> (Kan <sup>R</sup> ) $\Delta$ ( <i>mcrC-mrr</i> ) <sup>HB101</sup>                                                                                                        | NEB, UK<br>Cat. E4127                       |
| SHuffle <sup>®</sup> T7 | K12 derivative. Expresses DsbC chaperone in cytoplasm that enhances cytoplasmic disulfide bonds formation.                                                  | F <sup>+</sup> <i>lac</i> , <i>pro</i> , <i>lacI</i> <sup>Q</sup> / $\Delta$ ( <i>ara-leu</i> )7697 <i>araD139</i> <i>fhuA2</i> <i>lacZ::T7</i> <i>gene1</i> $\Delta$ ( <i>phoA</i> ) <i>PvuII</i> <i>phoR</i> <i>ahpC</i> <sup>*</sup> <i>galE</i> (or U) <i>galK</i> <i>att::pNEB3-r1-cDsbC</i> (Spec <sup>R</sup> , <i>lacI</i> <sup>Q</sup> ) $\Delta$ <i>trxB</i> <i>rpsL150</i> (Str <sup>R</sup> ) $\Delta$ <i>gor</i> $\Delta$ ( <i>malF</i> )3 | NEB, UK<br>Cat. C3026H                      |



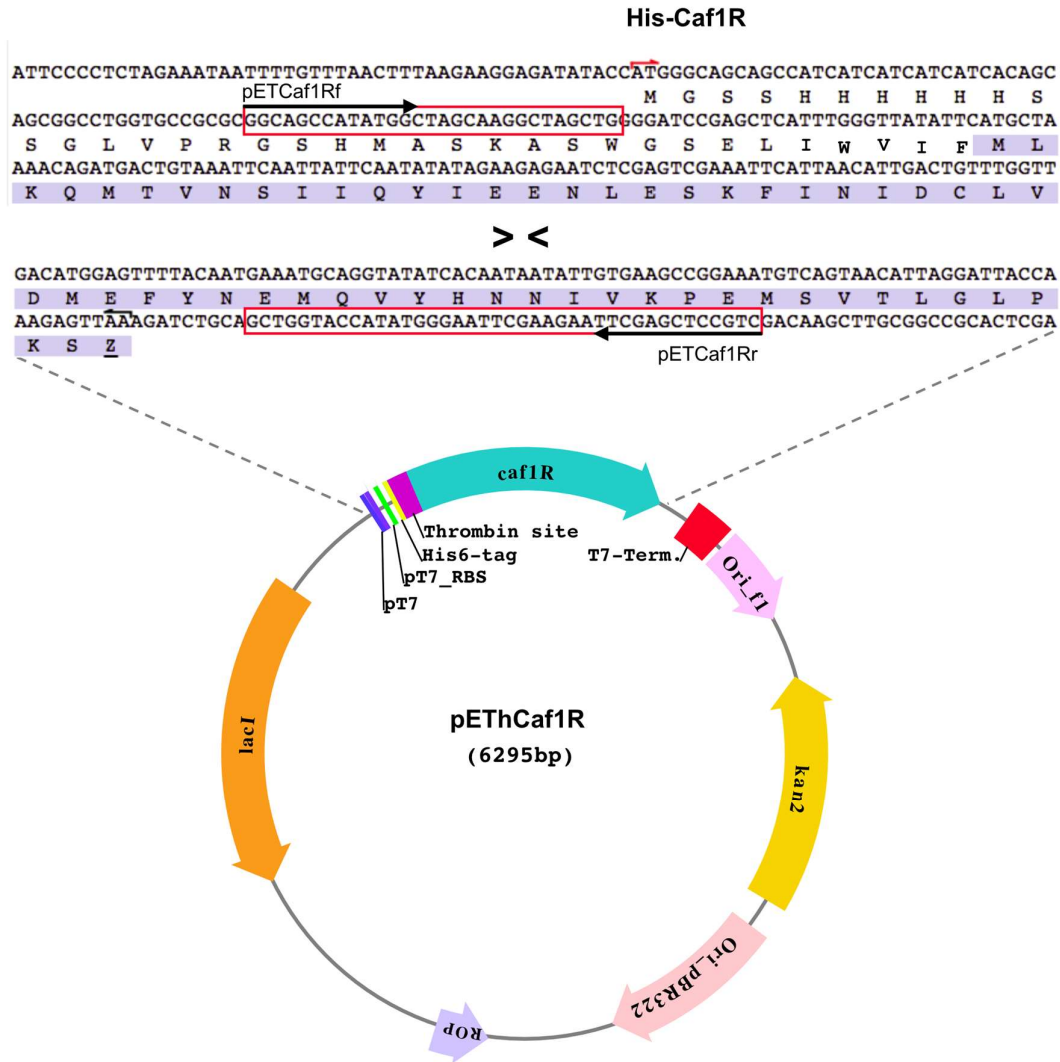

**Figure S2. The pETHCaf1R plasmid construct.** Relevant DNA sequence of pETHCaf1R, showing fusion joints and encoded His-Caf1R (338 aa; ~ 40 kDa), which has an N terminal addition of 6 His residues followed by a thrombin cleavage site. Encoded amino acids from *caf1R* are highlighted in blue. ><, represents sequence not shown. InFusion primers are enclosed in red boxes. Expression is under control of chromosomally encoded T7 polymerase, requires expression in *E. coli* BL21(DE3) and is induced by IPTG. Resistance marker is kanamycin. Circular plasmid map of pETHCaf1R with important features is indicated below.

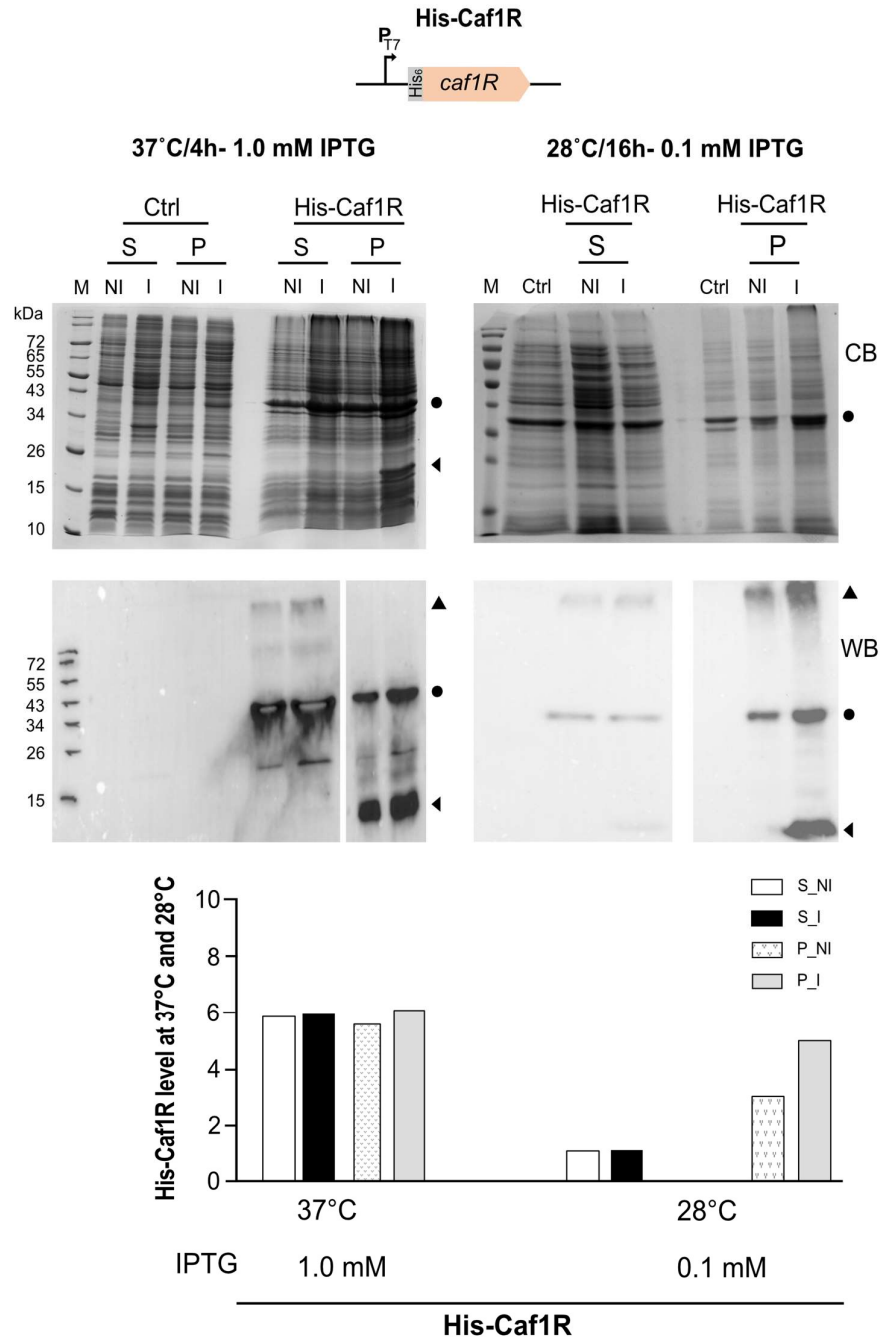

**Figure S3. Expression of His-Caf1R (native *caf1R*) from *E. coli* BL21(DE3).** Schematic of His-Caf1R from pETHCaf1R plasmid. CB-stained SDS-PAGE gel and WB analysis of full-length His-Caf1R expressed in *E. coli* BL21 (DE3). Total amount of full-length His-Caf1R was quantified from the respective WB. Cells were induced with IPTG at 37 °C and 28 °C, as indicated. Equal number of cells (1 OD unit) were harvested and mixed in 100  $\mu$ L of PBS supplemented with 1 $\times$  proteases inhibitor (EDTA-free) and lysed by sonication. Soluble supernatant (S) and insoluble pellet (P) fractions were prepared by ultracentrifugation of sonicated cell lysate. Expected location of His-Caf1R, confirmed in WB, is indicated by a dot (•). Truncated product is indicated by black arrow head. Location of high-molecular weight insoluble aggregates is represented by black triangle ( $\Delta$ ). Expression of His-Caf1R and degradation products were identified with antiHis-HRP monoclonal antibody and verified in comparison with negative control (Ctrl, empty plasmid). IPTG-induced and non-induced samples are indicated by I and NI, respectively. M, protein size (kDa) marker.

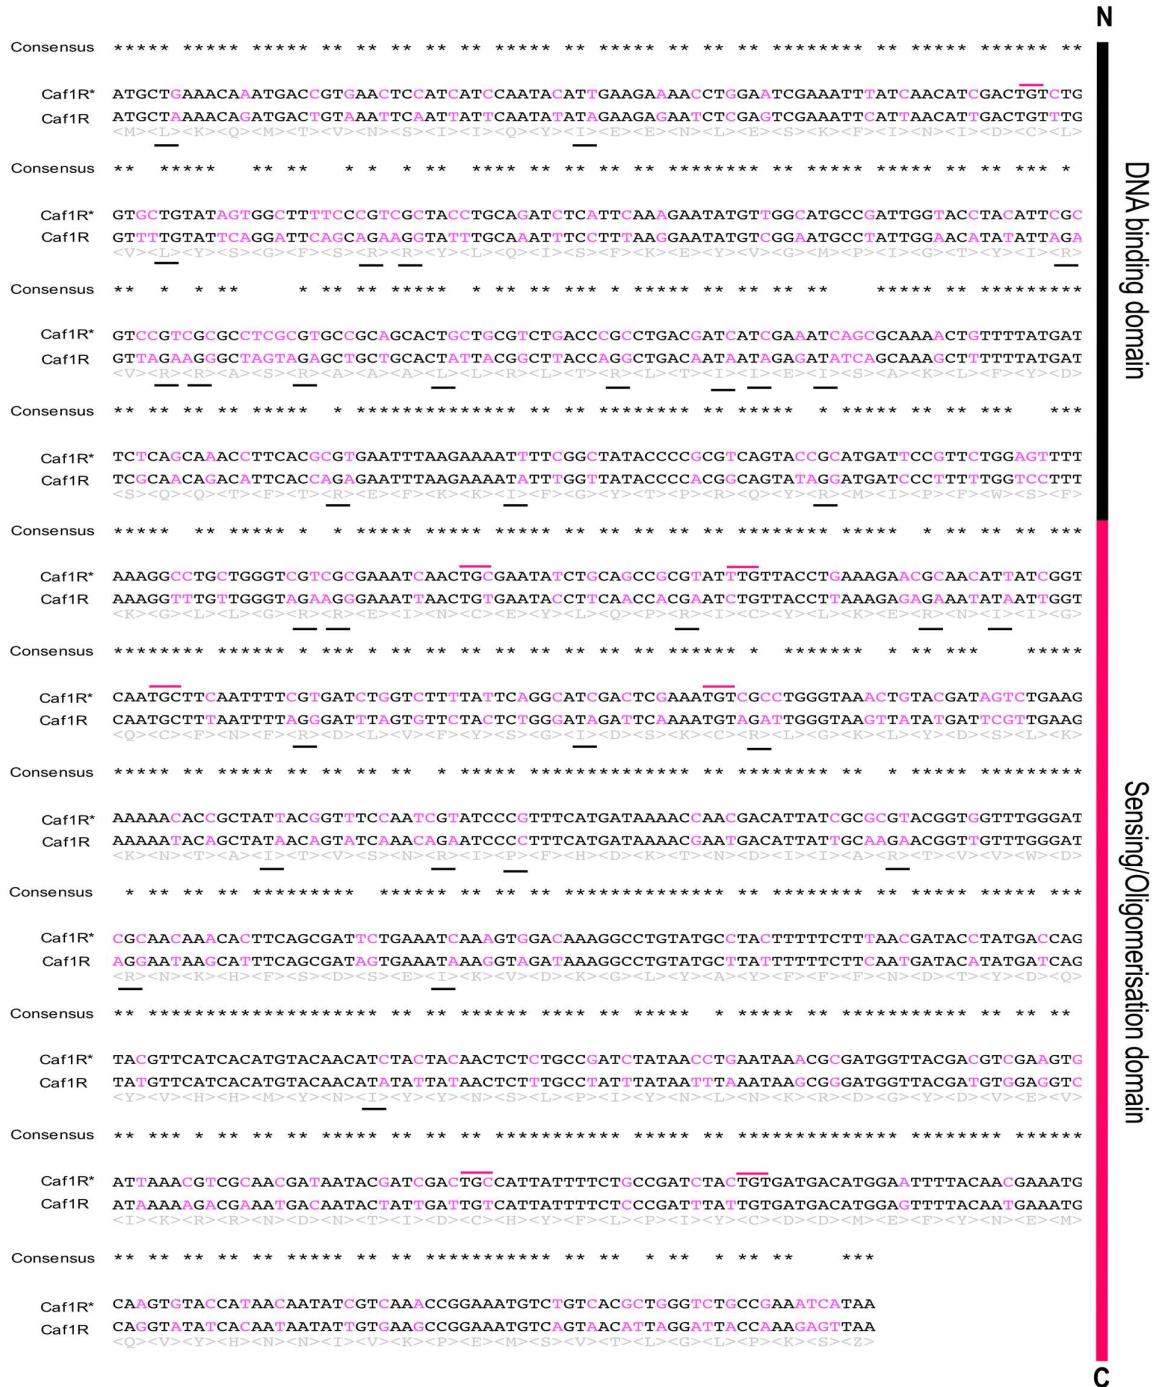

**Figure S4. Sequence alignment of native Caf1R with codon-optimised Caf1R\*.** Rare codons identified by RaCC calculator are indicated by black underlines (32 amino acids). Changes built by GenScript, USA throughout *caf1R* ORF are indicated in pink (232 nucleotides encoding 162 amino acids). The 7 Cys residues are indicated by red line above each. Consensus nucleotides are indicated by\*. Deduced amino acid sequence is indicated underneath of the alignment. Sequence encompassing the N-terminal DNA-binding domain (DBD) and C-terminal sensing/oligomerisation domain is indicated by respective thick vertical black and red line. Codon- optimised *caf1R\** supplied as pEthCaf1R\*.

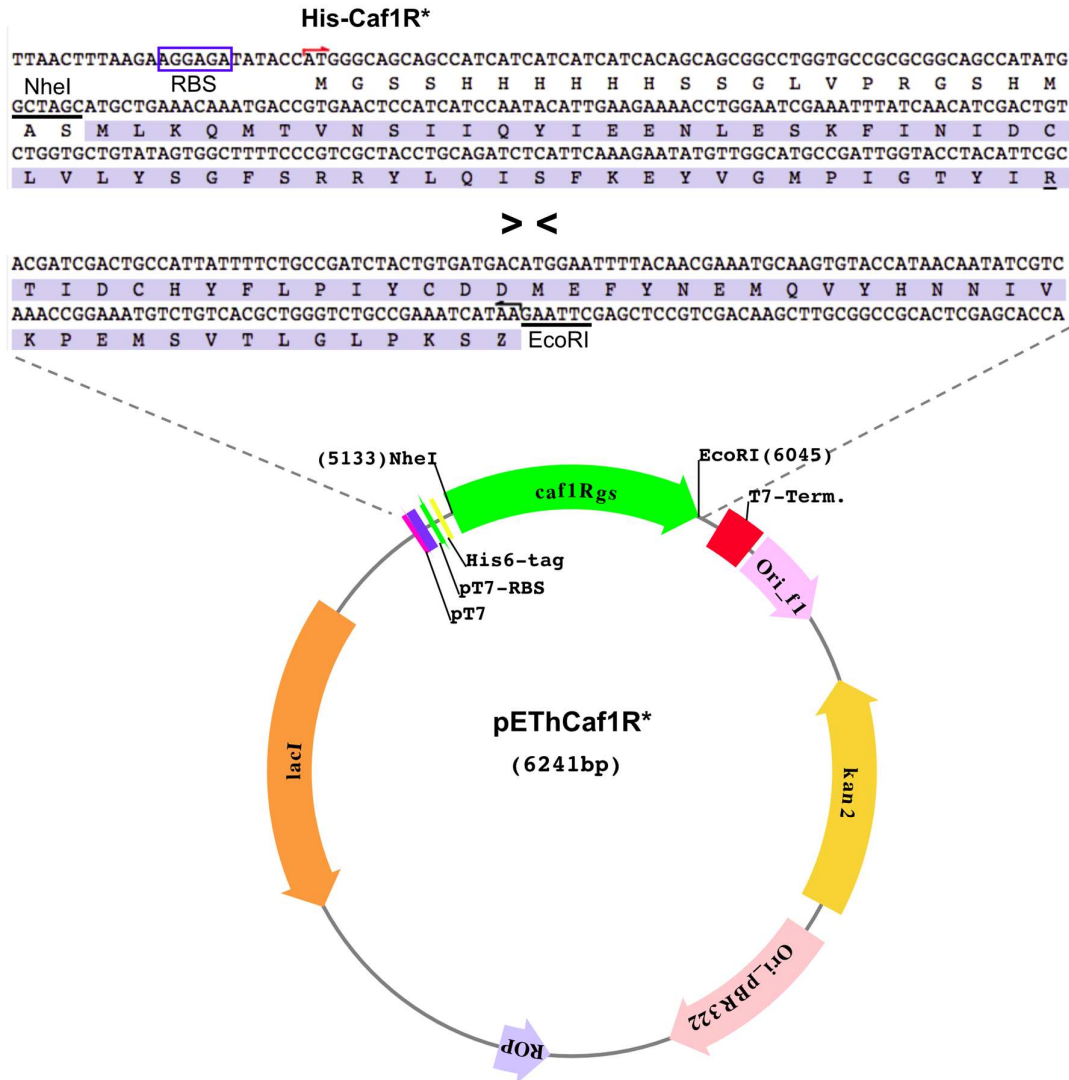

**Figure S5. The pETHCaf1R\* plasmid construct.** Sequence of codon-optimised synthetic *caf1R* (*caf1Rgs*) was cloned in between *NheI* and *EcoRI* sites (red boxes) of pET28a\*. The encoded *caf1R* amino acid sequence is highlighted in blue with upstream fusion of His<sub>6</sub>-tag followed by a short linker to create His-Caf1R\*, 325 aa, ~38.5 kDa). Ribosomal binding site, RBS is indicated in blue box. Expression is under control of chromosomally encoded T7 polymerase, requires expression in *E. coli* BL21(DE3) and is induced by IPTG. Resistance marker is kanamycin. Circular plasmid map of pETHCaf1R\* with important features is indicated below.

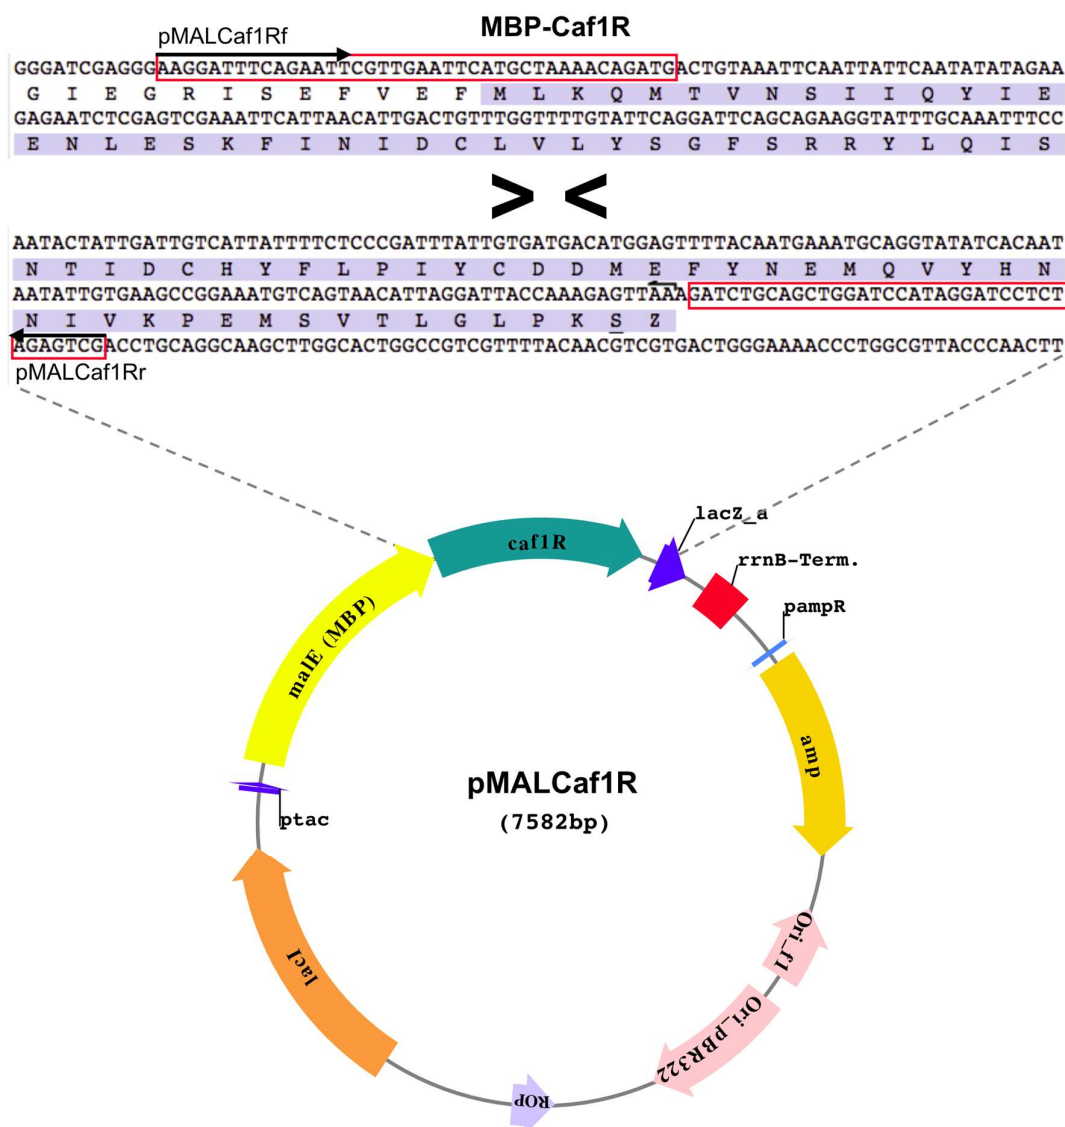

**Figure S6. The pMALCaf1R plasmid construct.** The pMALCaf1R encodes a MBP-Caf1R fusion (696 aa) of 79.36 kDa. Translated sequence derived from native *caf1R* (highlighted in blue); ><, represents sequence not shown; InFusion primers on either end (red box). Expression is under control of the  $P_{lac}$  promoter and is induced by IPTG. Resistance marker is ampicillin. Circular plasmid map of pMALCaf1R with important features is indicated below.

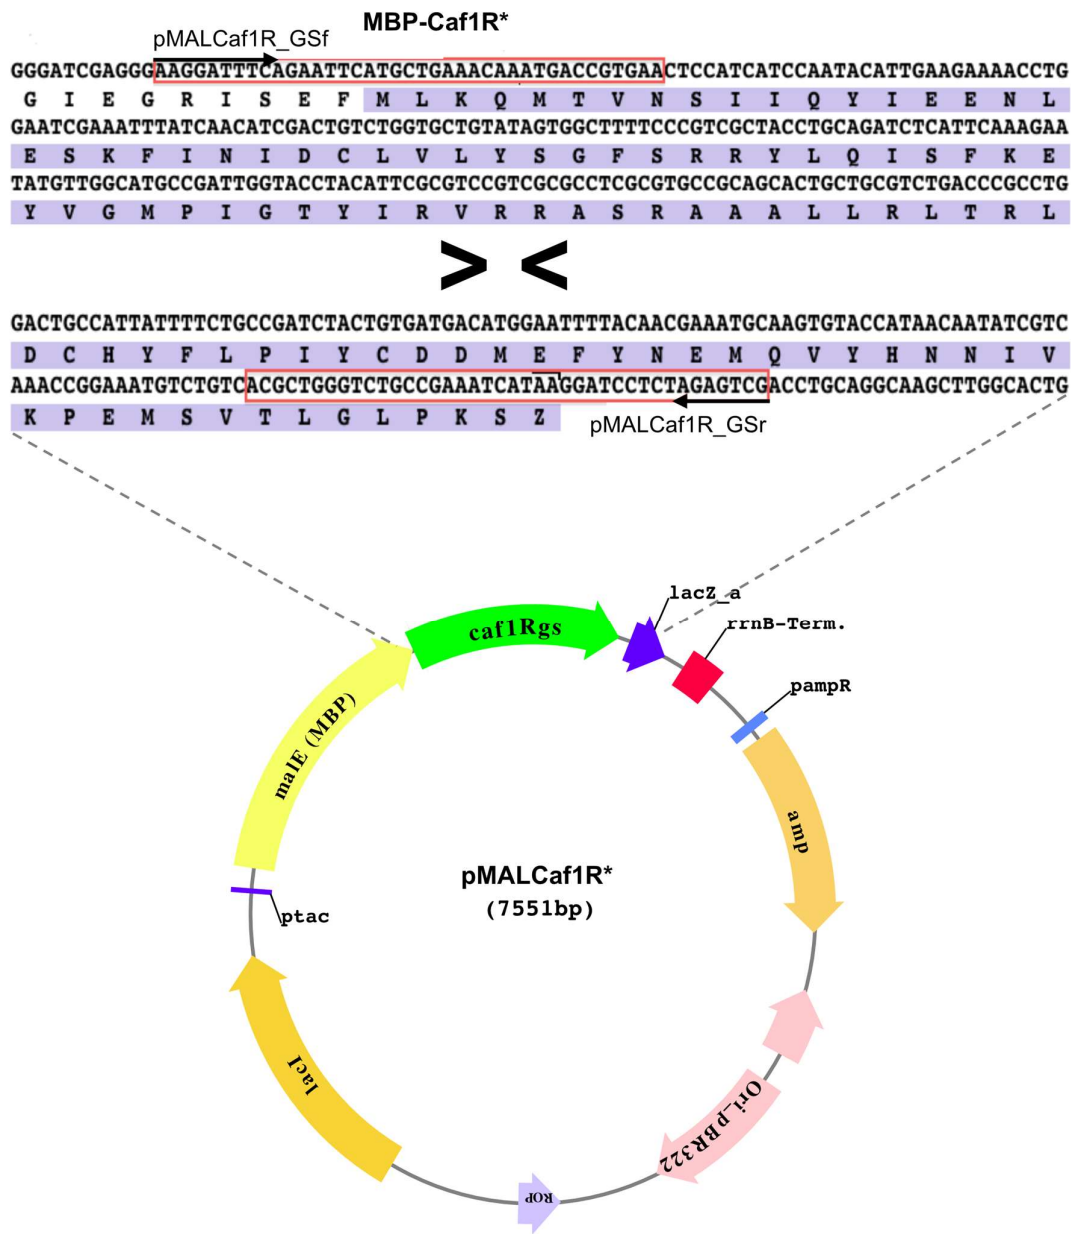

**Figure S7. The pMALCaf1R\* plasmid construct.** The deduced amino acid sequence of the codon-optimised Caf1R is highlighted in blue, fused to N-terminus MBP (only a few linker residues (black) are shown). InFusion primers, used in PCR amplification of *caf1R\** from pETHCaf1R\*, are shown in red boxes. Complete fusion of MBP-Caf1R\* codes 693 aa with a calculated molecular weight, 78.98 kDa. Expression is under control of the  $P_{tac}$  promoter and is induced by IPTG. Resistance marker is ampicillin. Circular plasmid map of pMALCaf1R\* with important features is shown underneath.

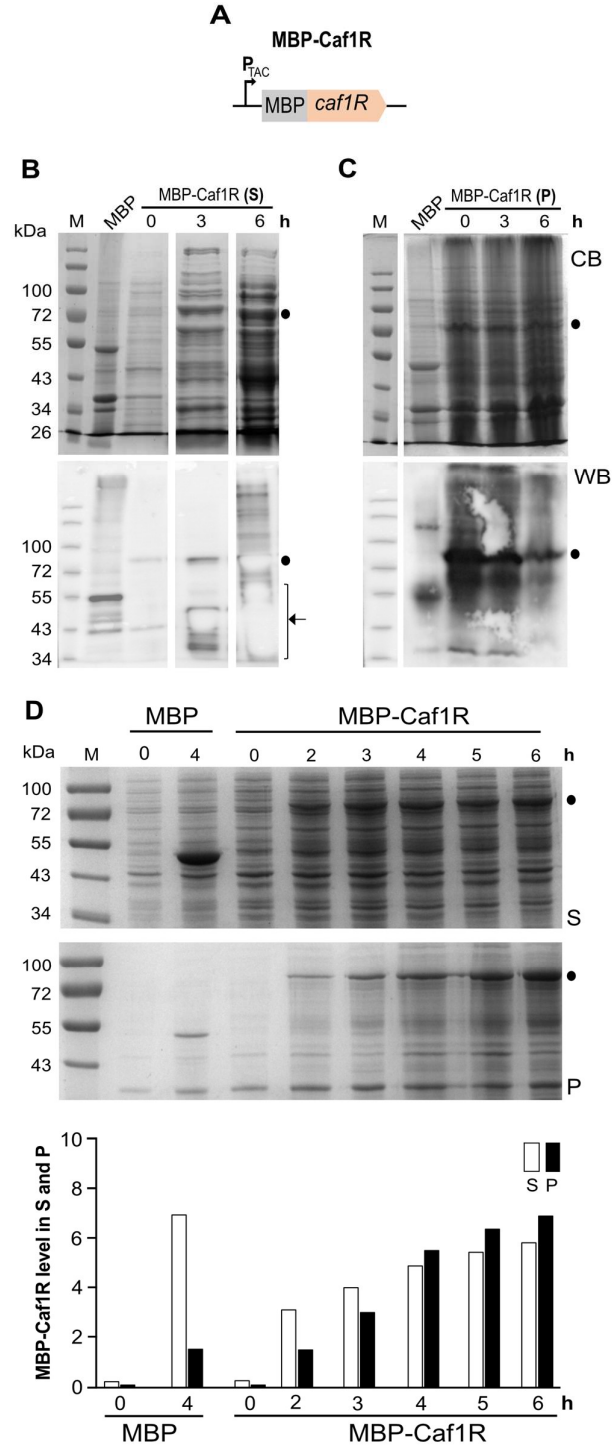

**Figure S8. Expression of MBP-Caf1R (native *caf1R*) from *E. coli* BL21(DE3) and K12 ER2508.** (A) Schematic of MBP-Caf1R from pMALCaf1R plasmid. MBP-Caf1R expression from *E. coli* BL21(DE3) (B-C), and from *E. coli* K12 ER2508 (D). As indicated, expression was monitored at 37 °C with 0.35 mM IPTG induction. Samples were processed for isolation of soluble (S) and insoluble (P) fractions at indicated times post IPTG-induction. Expected location of full-length MBP-Caf1R is indicated by a dot (•) and degradation/ truncation is shown by an arrow (←). Expression of MBP (Ctrl) from cells carrying empty plasmid (pMALc2x) can be seen at about 45 kDa. Relative level of MBP-Caf1R in S and P fractions was quantified from K12 ER2508 (E). Non-induced samples (0 h) and IPTG induced samples (2-6 h). M, protein size (kDa) marker.

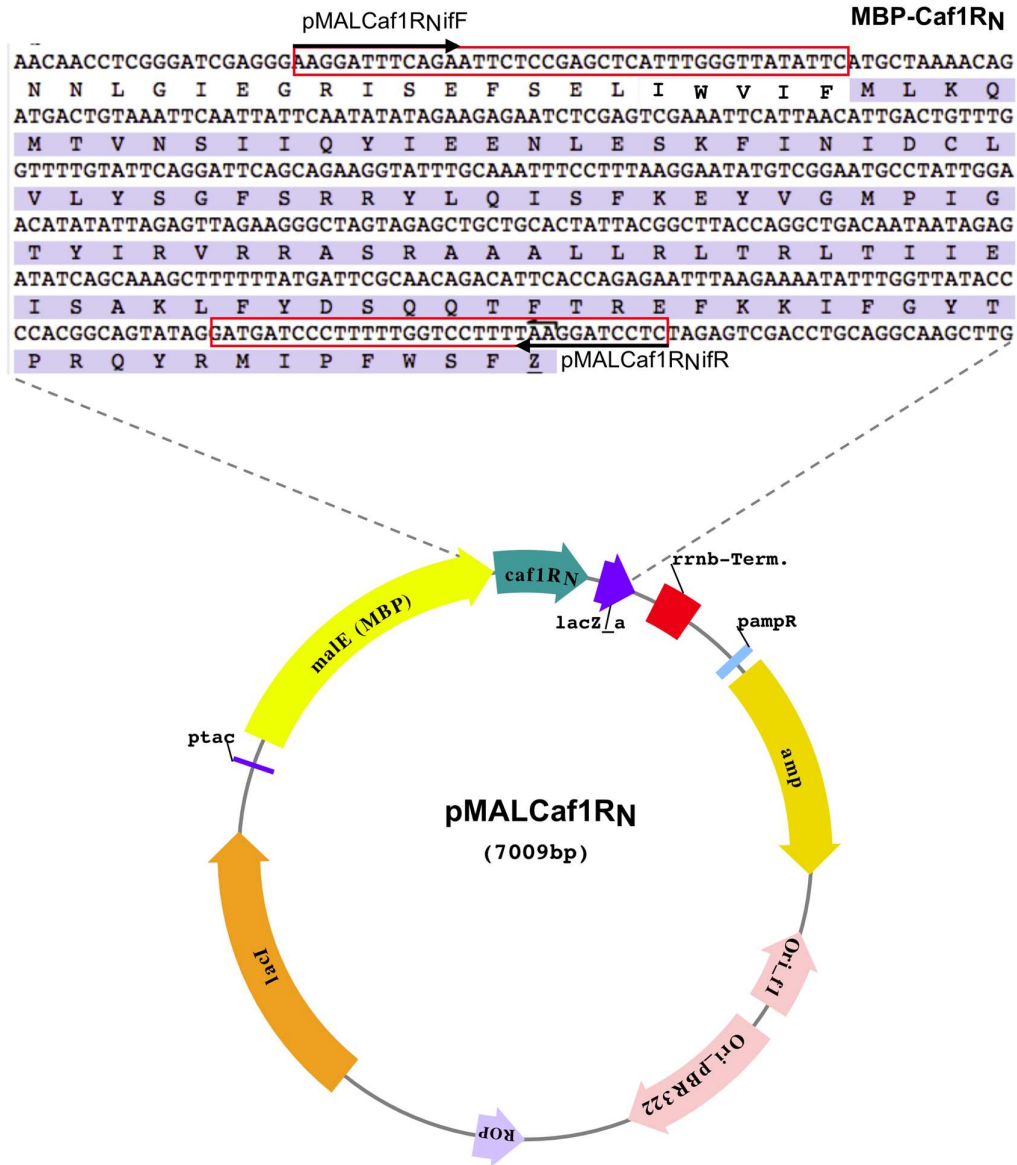

**Figure S9. The pMALCaf1RN plasmid construct.** The gene encoding Caf1RN was PCR-amplified from pMALCaf1R plasmid. The deduced amino acid sequence of the native Caf1RN is highlighted in blue, at the N-terminus this is fused to MBP (only a few linker residues (black) are shown). InFusion primers on either side are shown in red boxes. Complete fusion of MBP-Caf1RN codes 503 aa with a calculated molecular weight, 57.30 kDa. Expression is under control of the  $P_{tac}$  promoter and is induced by IPTG. Resistance marker is ampicillin. Circular plasmid map of pMALCaf1RN with important features is shown underneath.

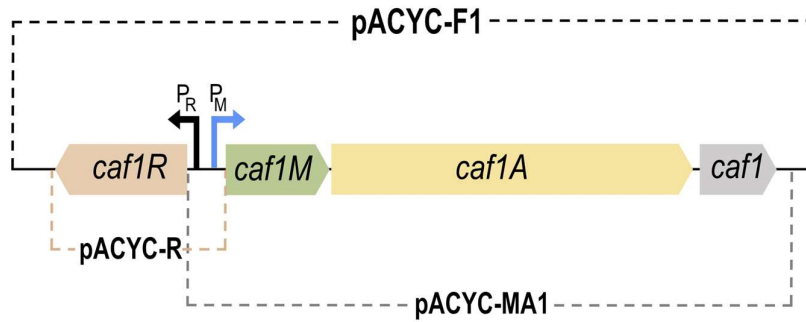

**Figure S10.** The pACYC-R and pACYC-MA1 plasmid constructs. Organisation of the *caf1* genes cluster (5.128 kb) cloned in the pACYCDuet-I vector and designed pACYC-F1 plasmid [4]. Genes are drawn as per their size and location, promoters transcribing *caf1R* (black arrow, P<sub>R</sub>) and *caf1M* (blue arrow, P<sub>M</sub>) are indicated. Both pACYC-R and pACYC-MA1 were designed by Inverse PCR from pACYC-F1 template using Q5 HiFi DNA polymerase (New England Biolabs, UK). Briefly, DNA fragment encompassing either full-length *caf1R* or *caf1M* operon under the control of native *caf1R*-*caf1M* intergenic region was PCR-amplified using primers pair, pACYC*caf1R*f and pACYC*caf1R*r (for pACYC-R) or Inv*caf1R*f and Inv*caf1R*r (for pACYC-MA1). Amplified-fragment containing desired region was gel-purified, digested either with *Sac*I (for pACYC-R) or *Nco*I (for pACYC-MA1) restriction enzymes and ligated by T4-DNA ligase (Thermo Fisher Scientific, UK). Both constructs were confirmed by sequencing. For all 3 plasmids induction is under control of the native *caf* regulatory region, at 37°C. Resistance marker is chloramphenicol.

## References

1. Simons, R.W.; Houman, F.; Kleckner, N. Improved single and multicopy *lac*-based cloning vectors for protein and operon fusions. *Gene*. **1987**, *53*, 85–96.
2. Galyov, E.; Karlishev, A.; Chernovskaya, T.; Dolgikh, D.; Smirnov, O.; Volkovoy, K.; Abramov, V.; Zav'yalov, V. Expression of the envelope antigen F1 of *Yersinia pestis* is mediated by the product of *caf1M* gene having homology with the chaperone protein PapD of *Escherichia coli*. *FEBS Lett.* **1991**, *286*, 79–82, doi:10.1016/0014-5793(91)80945-y
3. Karlyshev, A.V.; Galyov, E.E.; Abramov, V.M.; Zav'yalov, V.P. Caf1R gene and its role in the regulation of capsule formation of *Y. pestis*. *FEBS Lett.* **1992**, *305*, 37–40.
4. Kumar, D. Caf1R-Mediated Regulation of the F1 Surface Antigen of *Yersinia Pestis*. Ph.D. Thesis, University of Reading, Reading, UK, **2016**. British Library, UK (EthoS ID: 690097).
